# Supplementary material for: Identifying CpG methylation signature as a promising biomarker for recurrence and immunotherapy in non–small-cell lung carcinoma
Source: publisher site journal article supplement (doi:10.18632/aging.103517), 2020-07-28
Supplement: Supplementary file [file aging-v12i14-103517-supplementary-material-SD1.pdf]

SUPPLEMENTARY FIGURES

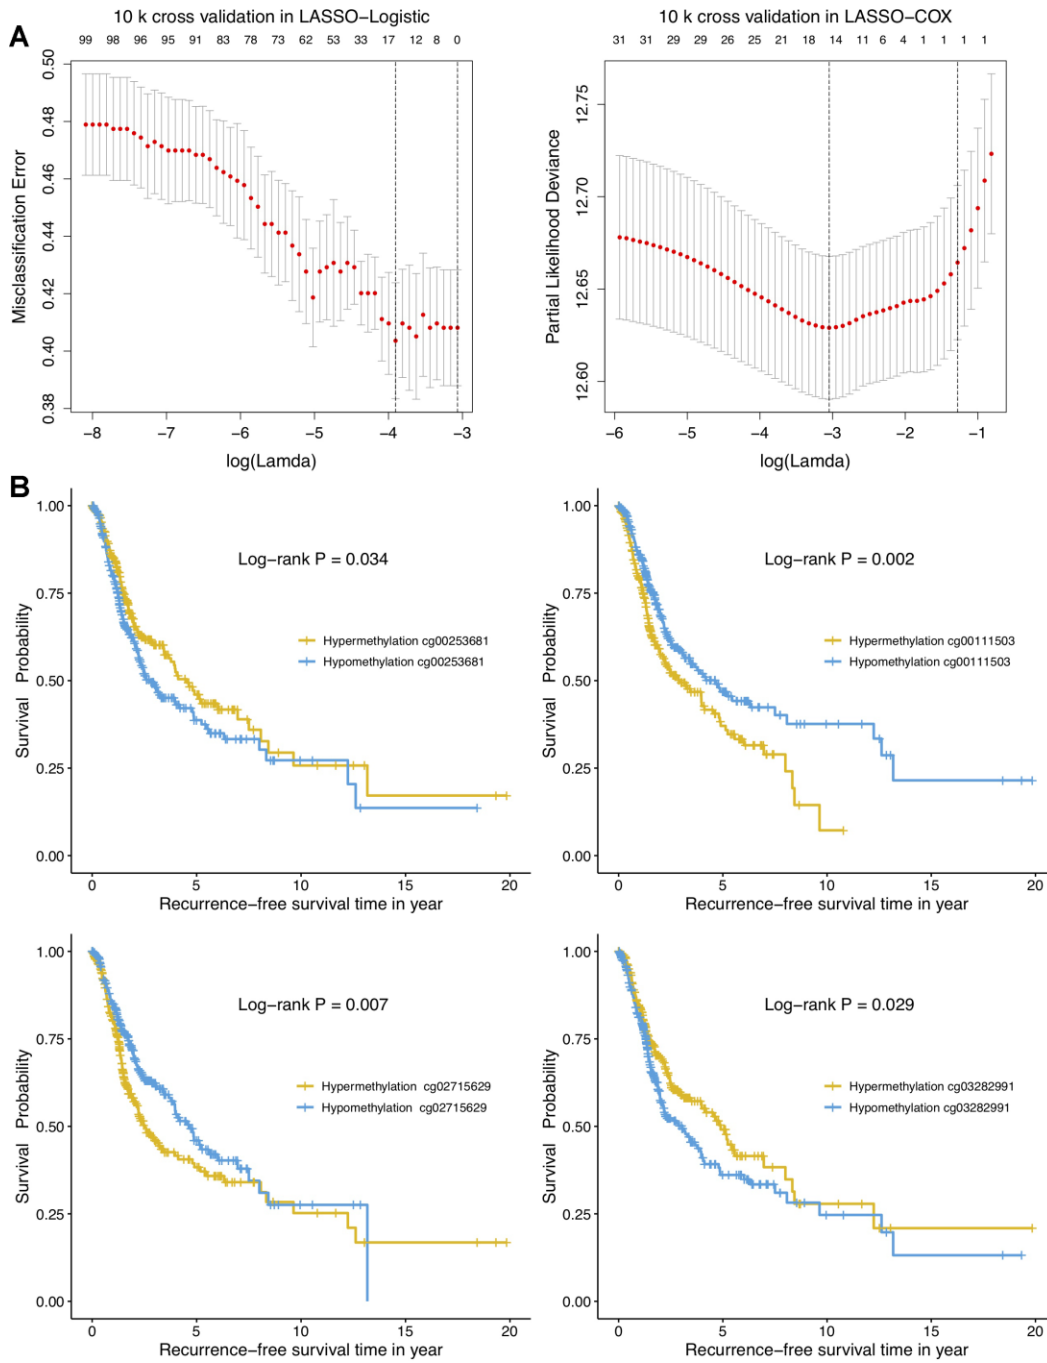

**Supplementary Figure 1.** (A) Ten-fold cross validations performed for obtaining optimal parameter lambda ( $\lambda$ ) in LASSO-Logistic (left) and LASSO-Cox analysis (right). The dotted vertical lines were plotted at values of log( $\lambda$ ) by minimum criteria and 1-Standard Error criteria in two LASSO models, respectively. The optimal values of  $\lambda$  were determined by minimum criteria where two dotted vertical lines were drawn in Figure 3A and Figure 3D, and thus 14 and 9 CpG markers with nonzero coefficients were screened out. (B) Kaplan-Meier curves of four final selected CpGs present their correlation with recurrence and prognostic prediction of NSCLC patients in training cohort.

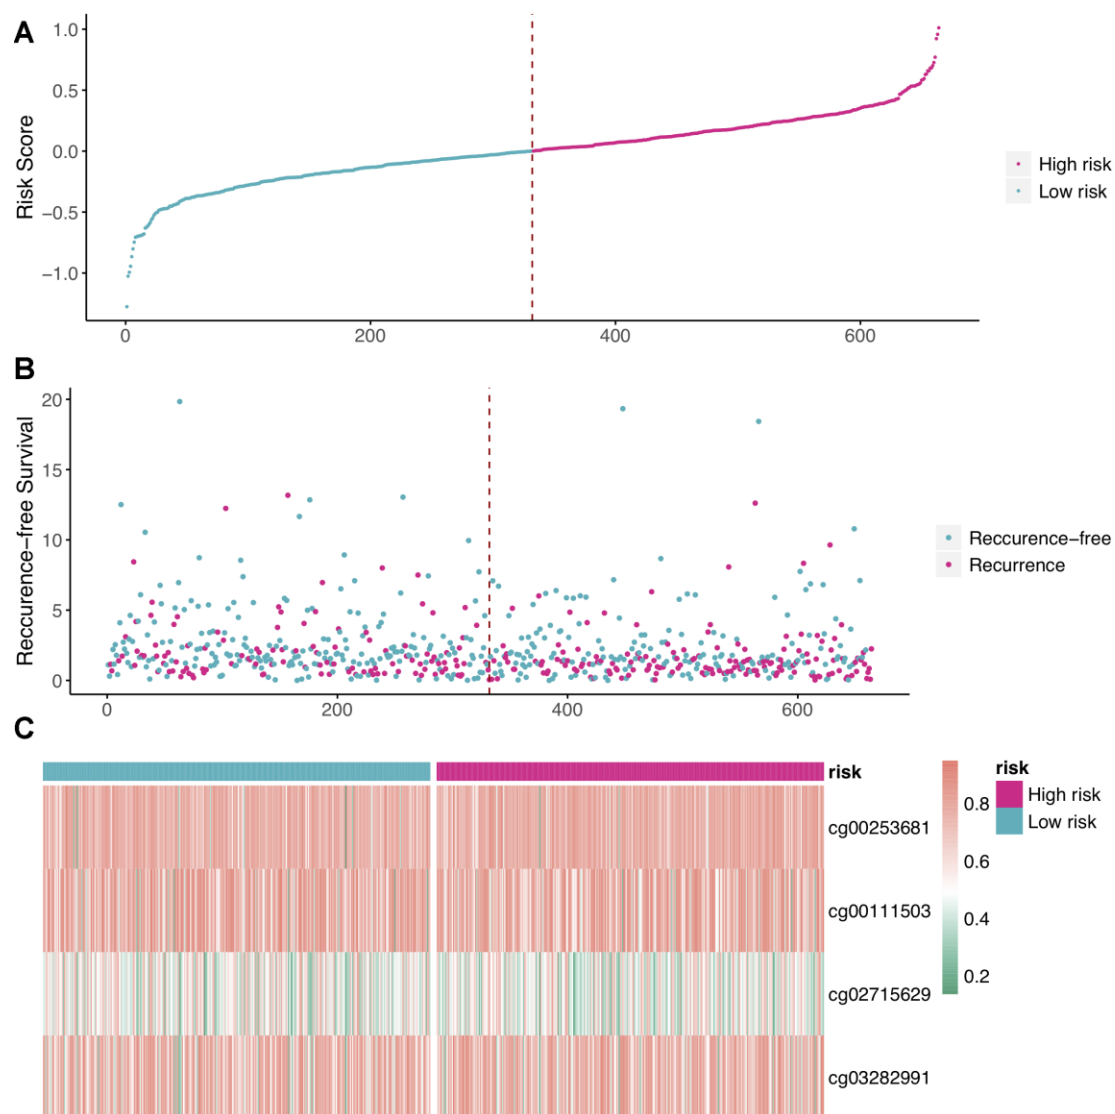

**Supplementary Figure 2. Association chart of relapse risk factors.** (A, B) Distribution of risk score and RFS of TCGA NSCLC patients in high- and low-risk groups. (C) The heatmap of DNAm profile of 4 final selected CpGs.

Hazard ratio for disease recurrence of TCGA-LUNG

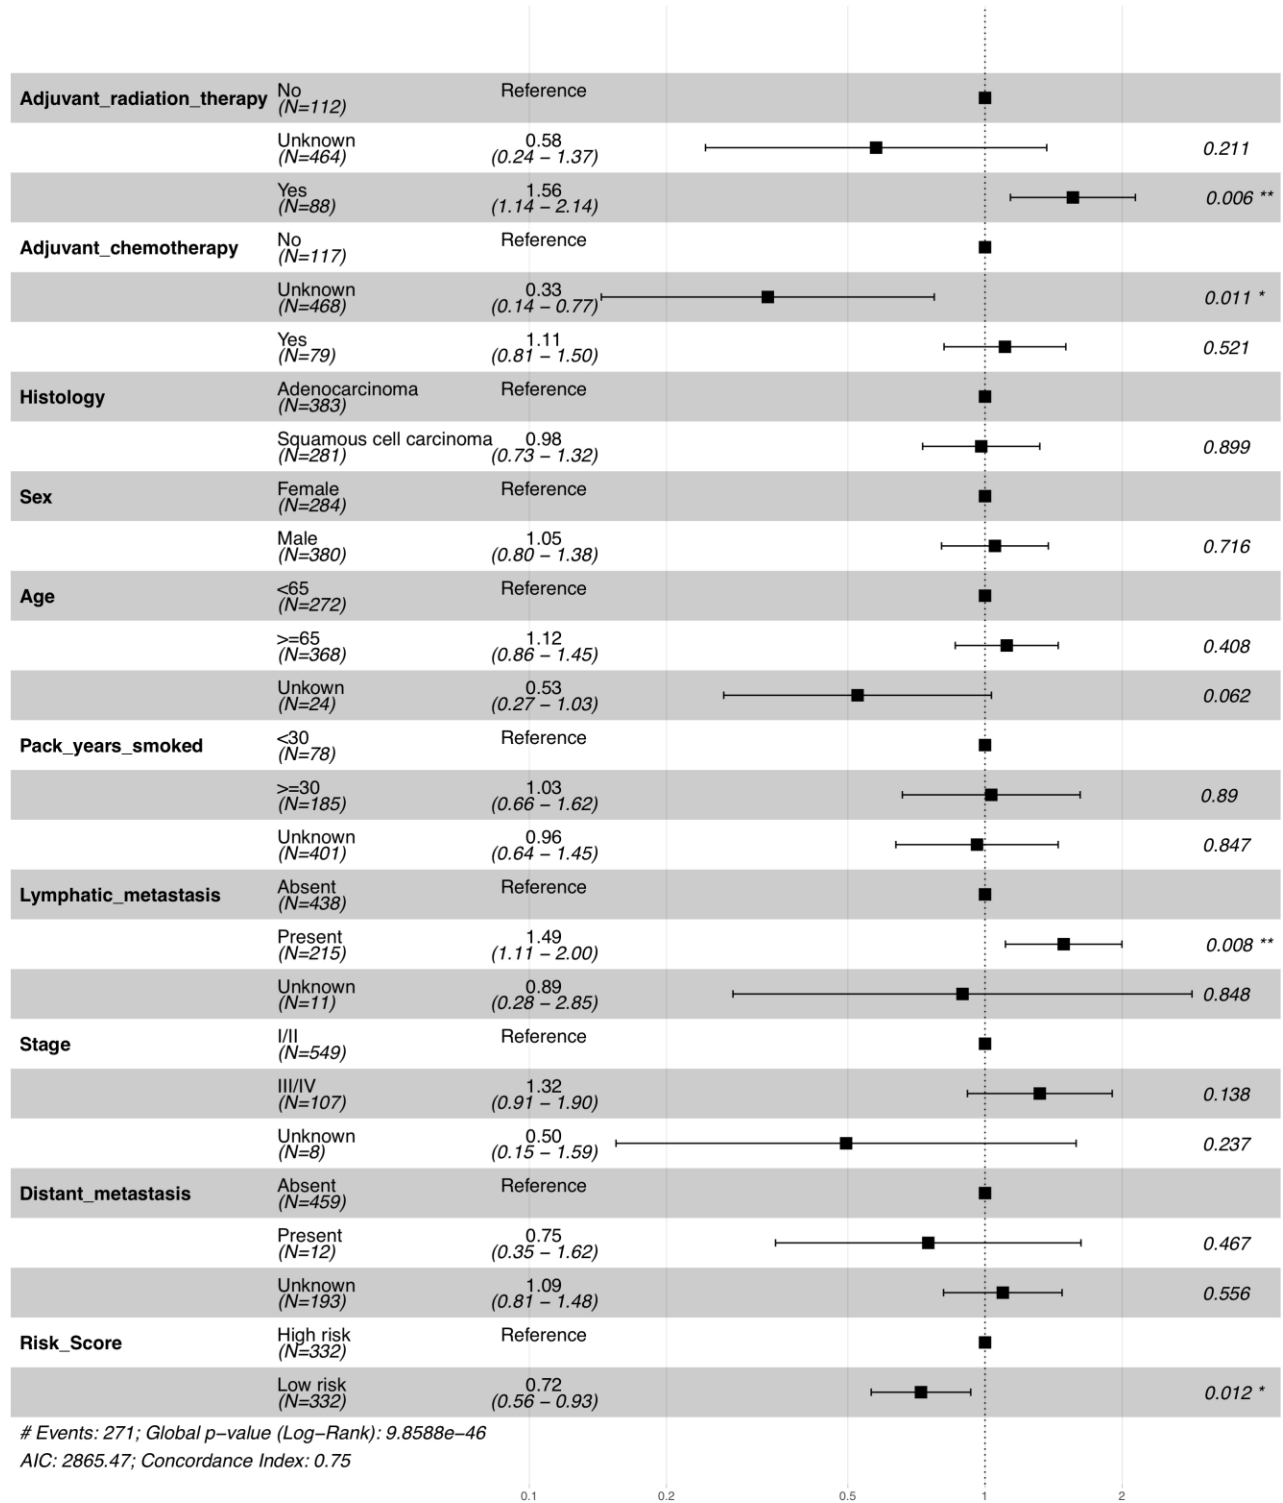

Supplementary Figure 3. Multivariate Cox regression analysis for RFS of TCGA NSCLC patients with combinations of DNAm-based risk score and clinical factors.

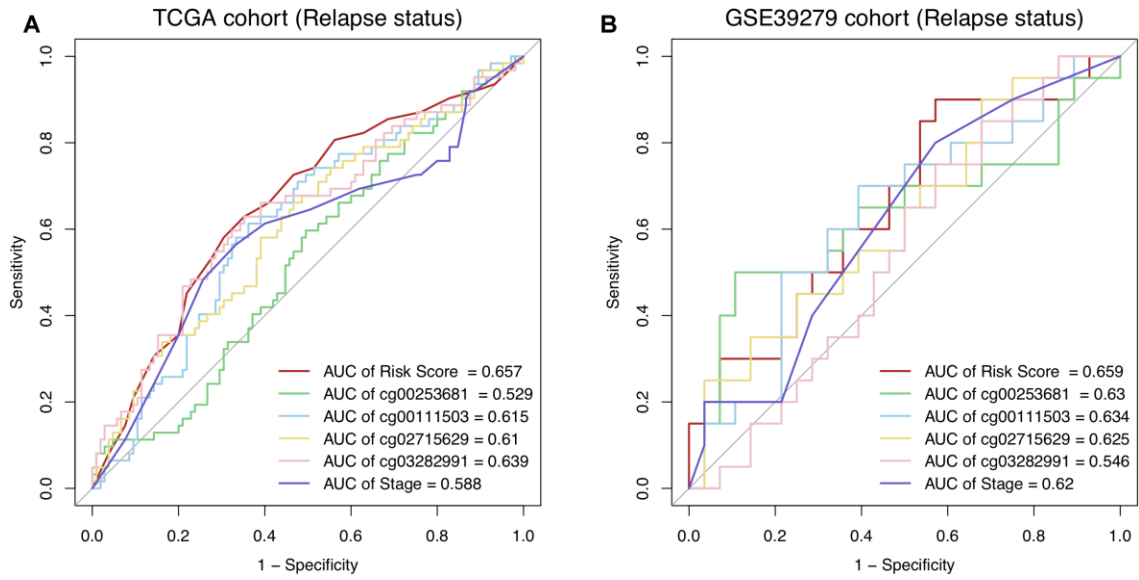

**Supplementary Figure 4.** Receiver operating characteristic (ROC) curves of the combined risk score, clinical stage and 4 separate CpGs demonstrate their performance of discrimination for relapse status in training (A) and validation (B) cohorts.

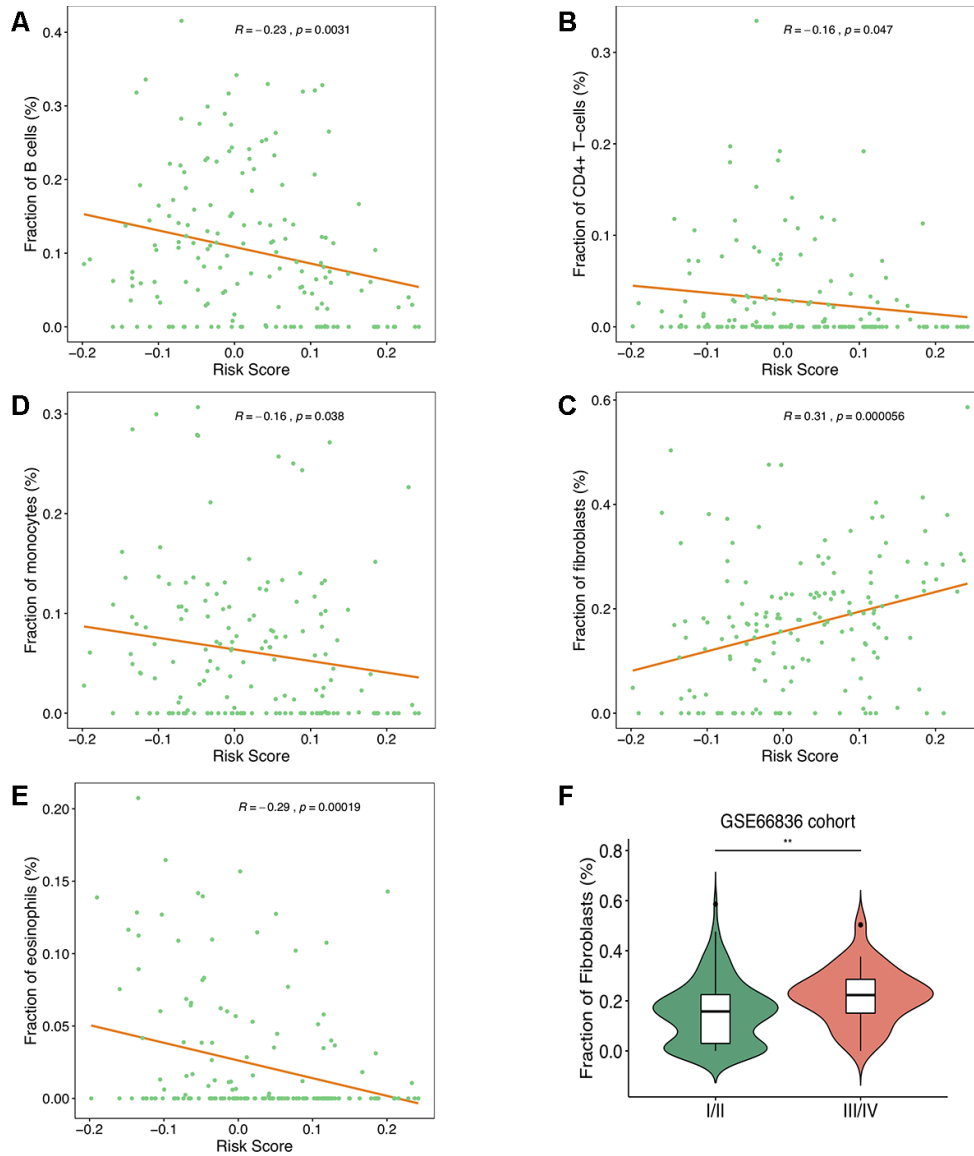

**Supplementary Figure 5.** Estimated compositions of B-cells (A), CD4+ T-cells (B), fibroblasts (C), monocytes (D) and eosinophils (E) were significantly correlated with DNAm-based risk score in GSE66836 cohort. (F) Fraction of fibroblasts in NSCLC samples at late stage was significantly higher than those at early stage.

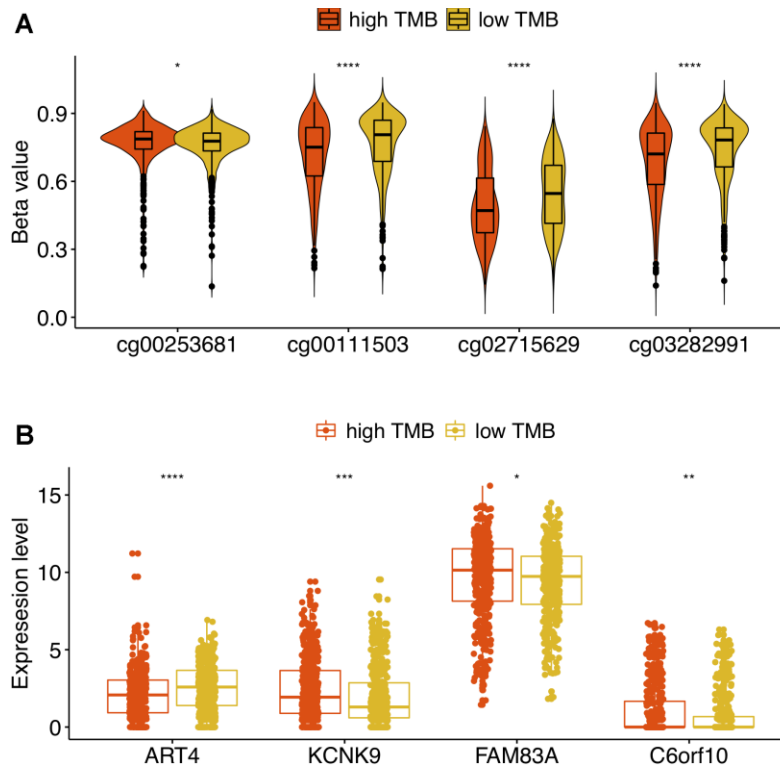

**Supplementary Figure 6. The correlation of TMB with four CpGs methylation status and expression of four nearby genes. (A)** Methylation levels of 4 identified DMPs in high TMB compared with low TMB group. **(B)** Differential expression of 4 reference genes in high and low TMB.
