# Supplementary material for: Identifying CpG methylation signature as a promising biomarker for recurrence and immunotherapy in non–small-cell lung carcinoma
Source: publisher site journal article supplement (doi:10.18632/aging.103517), 2020-07-28
Supplement: Supplementary file [file aging-v12i14-103517-supplementary-material-SD2.pdf]

## SUPPLEMENTARY TABLES

**Supplementary Table 1. Clinical characteristics of patients for included study cohorts.**

| Characteristics            |                         | Training cohort (TCGA) | Validation cohort (GSE39279) | Validation cohort (GSE66836) | Validation cohort (GSE119144) |
|----------------------------|-------------------------|------------------------|------------------------------|------------------------------|-------------------------------|
| Total                      |                         | n=823                  | n=444                        | n=164                        | n=60                          |
| Sex                        | Female                  | 340                    | 190                          | 91                           |                               |
|                            | Male                    | 483                    | 254                          | 73                           |                               |
| Age                        | <65                     | 318                    | 200                          |                              |                               |
|                            | >=65                    | 466                    | 243                          |                              |                               |
|                            | Unknown                 | 39                     | 1                            |                              |                               |
| Pack-years smoked          | <30                     | 94                     | 124                          |                              |                               |
|                            | >=30                    | 228                    | 237                          |                              |                               |
|                            | Unknown                 | 501                    | 83                           |                              |                               |
| Histology                  | Adenocarcinoma          | 455                    | 322                          | 164                          |                               |
|                            | Squamous cell carcinoma | 368                    | 122                          | 0                            |                               |
| Stage                      | I                       | 420                    | 237                          | 93                           |                               |
|                            | II                      | 244                    | 94                           | 40                           |                               |
|                            | III                     | 127                    | 102                          | 29                           |                               |
|                            | IV                      | 24                     | 11                           | 2                            |                               |
|                            | Unknown                 | 8                      |                              |                              |                               |
| Lymphatic metastasis       | Absent                  | 534                    | 239                          |                              |                               |
|                            | Present                 | 273                    | 116                          |                              |                               |
|                            | Unknown                 | 16                     | 89                           |                              |                               |
| Distant metastasis         | Absent                  | 577                    | 344                          |                              |                               |
|                            | Present                 | 23                     | 11                           |                              |                               |
|                            | Unknown                 | 223                    | 89                           |                              |                               |
| Adjuvant radiation therapy | Yes                     | 129                    | 235                          |                              |                               |
|                            | No                      | 90                     | 39                           |                              |                               |
|                            | Unknown                 | 604                    | 170                          |                              |                               |
| Adjuvant chemotherapy      | Yes                     | 136                    | 250                          |                              |                               |
|                            | No                      | 79                     | 24                           |                              |                               |
|                            | Unknown                 | 608                    | 170                          |                              |                               |
| Outcome(RFS)               | Recurrence-free         | 399                    | 150                          |                              | 10                            |
|                            | Recurrence              | 269                    | 161                          |                              | 49                            |
|                            | Unknown                 | 155                    | 133                          |                              | 1                             |
| Outcome(OS)                | Alive                   | 502                    |                              |                              |                               |
|                            | Dead                    | 321                    |                              |                              |                               |
| Follow up time(year/month) | Available(PFS)          | 662                    |                              |                              | 59                            |
|                            | Unknown(PFS)            | 161                    |                              |                              | 1                             |
|                            | Available(OS)           | 808                    |                              |                              |                               |
|                            | Unknown(OS)             | 15                     |                              |                              |                               |

\*RFS : recurrence-free survival status; OS : overall survival status.

**Supplementary Table 2. Recurrence associated CpG markers identified by Univariate Cox, Random Forest and LASSO methods in training cohort.**

| Marker ID  | Chr   | Pos       | Ref Gene  | Location        | logFC  | adj.P       | Method                                                |
|------------|-------|-----------|-----------|-----------------|--------|-------------|-------------------------------------------------------|
| cg00017489 | chr7  | 153583318 | DPP6      | TSS1500         | 0.291  | 5.61E-39    | LASSO-Logistic/Random Forest                          |
| cg00253681 | chr12 | 14996583  | ART4      | TSS200          | 0.119  | 2.50E-21    | LASSO-Logistic/Random Forest/Univariate Cox/LASSO-Cox |
| cg00682263 | chr15 | 66188803  | MEGF11    | 3'UTR           | 0.382  | 2.88E-87    | LASSO-Logistic                                        |
| cg02382109 | chr8  | 22785456  | PEBP4     | TSS200          | 0.064  | 2.43E-06    | LASSO-Logistic/Random Forest/LASSO-Cox                |
| cg03389538 | chr3  | 128779498 | GP9       | TSS200          | 0.043  | 7.37E-07    | LASSO-Logistic/Random Forest                          |
| cg03502002 | chr18 | 74962133  | GALR1     | 1stExon;5'UTR   | 0.463  | 7.43E-52    | LASSO-Logistic/Random Forest/LASSO-Cox                |
| cg00111503 | chr8  | 140631116 | KCNK9     | Body            | -0.169 | 7.35E-20    | LASSO-Logistic/Random Forest/Univariate Cox/LASSO-Cox |
| cg00814751 | chr5  | 176072170 | EIF4E1B   | Body            | -0.095 | 1.19E-10    | LASSO-Logistic                                        |
| cg01522296 | chr22 | 50452415  | IL17REL   | TSS1500         | -0.107 | 2.26E-13    | LASSO-Logistic/Random Forest                          |
| cg02310286 | chr8  | 88886432  | DCAF4L2   | TSS200          | -0.141 | 9.58E-11    | LASSO-Logistic/Random Forest/Univariate Cox           |
| cg02407493 | chr16 | 2068942   | NPW       | TSS1500         | -0.148 | 5.53E-19    | LASSO-Logistic/Random Forest/Univariate Cox           |
| cg02715629 | chr8  | 124193817 | FAM83A    | TSS1500;TSS1500 | -0.247 | 1.75E-35    | LASSO-Logistic/Random Forest/Univariate Cox/LASSO-Cox |
| cg02901006 | chr19 | 8117024   | CCL25     | TSS1500         | -0.117 | 1.57E-10    | LASSO-Logistic/Random Forest                          |
| cg03282991 | chr6  | 32294260  | C6orf10   | Body            | -0.166 | 1.03E-17    | LASSO-Logistic/Univariate Cox/LASSO-Cox               |
| cg00446413 | chr7  | 153749206 | DPP6      | TSS1500;Body    | 0.264  | 1.41E-50    | Random Forest                                         |
| cg02263813 | chr16 | 56672640  | MT1A      | 1stExon;5'UTR   | 0.233  | 2.38E-28    | Random Forest                                         |
| cg02099194 | chr13 | 43149689  | TNFSF11   | Body;5'UTR      | -0.153 | 6.42E-19    | Random Forest                                         |
| cg00914726 | chr1  | 60539400  | C1orf87   | 1stExon;5'UTR   | 0.233  | 3.82E-17    | Random Forest                                         |
| cg00472801 | chr6  | 62995876  | KHDRBS2   | 1stExon;5'UTR   | 0.132  | 8.77E-13    | Random Forest                                         |
| cg02096663 | chr4  | 178650141 | LOC285501 | Body            | -0.147 | 2.55E-10    | Random Forest                                         |
| cg00174500 | chr14 | 23846479  | CMTM5     | 1stExon;1stExon | 0.045  | 0.000975951 | Random Forest/LASSO-Cox                               |
| cg02062418 | chr16 | 1494677   | CCDC154   | TSS200          | -0.036 | 7.32E-06    | Random Forest/LASSO-Cox                               |
| cg03322234 | chr7  | 1022643   | CYP2W1    | TSS200          | -0.033 | 0.046378826 | Random Forest/LASSO-Cox                               |
| cg02992224 | chr11 | 93822294  | HEPHL1    | Body            | -0.123 | 1.25E-11    | Random Forest                                         |
| cg01466017 | chr10 | 17496720  | ST8SIA6   | TSS1500         | 0.095  | 1.55E-07    | Univariate Cox                                        |
| cg03377767 | chr2  | 17997138  | MSGN1     | TSS1500         | -0.249 | 5.44E-47    | Univariate Cox                                        |

\*logFC: log2 fold change; adj.P: Benjamini-Hochberg adjusted P value.

**Supplementary Table 3. Multivariable regression analysis for PFS of TCGA NSCLC patients conducted on clinical factors in combination with 13 biomarkers identified by LASSO-Cox and univariate Cox models.**

| <b>Characteristics</b>     |                                             | <b>Coefficient</b> | <b>Hazard Ratio</b> |
|----------------------------|---------------------------------------------|--------------------|---------------------|
| Adjuvant radiation therapy | Yes vs. No                                  | 0.461              | 1.59                |
|                            | Unknown vs. No                              | -0.514             | 0.6                 |
| Adjuvant chemotherapy      | Yes vs. No                                  | 0.206              | 1.23                |
|                            | Unknown vs. No                              | -1.13              | 0.32                |
| Histology                  | Squamous cell carcinoma vs. Adenocarcinoma  | 0.098              | 1.1                 |
| Sex                        | Male vs. Female                             | 0.062              | 1.06                |
| Age                        | >=65 vs. <65                                | 0.17               | 1.19                |
|                            | Unknown vs. <65                             | -0.552             | 0.58                |
| Pack-years smoked          | >=30 vs. <30                                | 0.091              | 1.1                 |
|                            | Unknown vs. <30                             | -0.037             | 0.96                |
| Lymphatic metastasis       | Present vs. Absent                          | 0.373              | 1.45                |
|                            | Unknown vs. Absent                          | 0.009              | 1.01                |
| Stage                      | III/IV vs. I/II                             | 0.347              | 1.41                |
|                            | Unknown vs. I/II                            | -0.872             | 0.42                |
| Distant metastasis         | Present vs. Absent                          | -0.422             | 0.66                |
|                            | Unknown vs. Absent                          | 0.049              | 1.05                |
| <b>cg00253681</b>          | <b>Hypermethylation vs. Hypomethylation</b> | <b>0.339</b>       | <b>1.4</b>          |
| cg02382109                 | Hypermethylation vs. Hypomethylation        | 0.057              | 1.06                |
| cg03502002                 | Hypermethylation vs. Hypomethylation        | -0.27              | 0.76                |
| <b>cg00111503</b>          | <b>Hypermethylation vs. Hypomethylation</b> | <b>-0.337</b>      | <b>0.71</b>         |
| <b>cg02715629</b>          | <b>Hypermethylation vs. Hypomethylation</b> | <b>-0.138</b>      | <b>0.87</b>         |
| <b>cg03282991</b>          | <b>Hypermethylation vs. Hypomethylation</b> | <b>0.037</b>       | <b>1.04</b>         |
| cg00174500                 | Hypermethylation vs. Hypomethylation        | -0.389             | 0.68                |
| cg02062418                 | Hypermethylation vs. Hypomethylation        | 0.261              | 1.3                 |
| cg03322234                 | Hypermethylation vs. Hypomethylation        | 0.302              | 1.35                |
| cg01466017                 | Hypermethylation vs. Hypomethylation        | 0.249              | 1.28                |
| cg02310286                 | Hypermethylation vs. Hypomethylation        | -0.18              | 0.84                |
| cg02407493                 | Hypermethylation vs. Hypomethylation        | 0.064              | 1.07                |
| cg03377767                 | Hypermethylation vs. Hypomethylation        | -0.044             | 0.96                |

**Supplementary Table 4. Multivariate Cox regression analysis for OS of TCGA NSCLC patients with combinations of DNAm-based risk score and clinical factors.**

| <b>Characteristics</b>     |                                            | <b>Hazard Ratio</b> | <b>CI</b> | <b>P Value</b> |
|----------------------------|--------------------------------------------|---------------------|-----------|----------------|
| Adjuvant chemotherapy      | Yes vs. No                                 | 0.71                | 0.48-1.06 | 0.094          |
|                            | Unknown vs. No                             | 0.43                | 0.2-0.93  | 0.032          |
| Adjuvant radiation therapy | Yes vs. No                                 | 1.28                | 0.86-1.89 | 0.218          |
|                            | Unknown vs. No                             | 1.26                | 0.58-2.77 | 0.557          |
| Age                        | >=65 vs. <65                               | 1.23                | 0.96-1.57 | 0.095          |
|                            | Unknown vs. <65                            | 0.55                | 0.26-1.14 | 0.11           |
| Distant metastasis         | Present vs. Absent                         | 1.72                | 0.96-3.09 | 0.069          |
|                            | Unknown vs. Absent                         | 1.17                | 0.88-1.56 | 0.278          |
| Histology                  | Squamous cell carcinoma vs. Adenocarcinoma | 1.17                | 0.9-1.52  | 0.232          |
| Lymphatic metastasis       | Present vs. Absent                         | 1.53                | 1.17-2.02 | 0.002          |
|                            | Unknown vs. Absent                         | 1.58                | 0.69-3.61 | 0.279          |
| Pack-years smoked          | >=30 vs. <30                               | 1.1                 | 0.72-1.69 | 0.652          |
|                            | Unknown vs. <30                            | 1.08                | 0.73-1.6  | 0.707          |
| Risk Model                 | High risk vs. Low risk                     | 1.4                 | 1.11-1.77 | 0.004          |
| Sex                        | Male vs. Female                            | 0.99                | 0.78-1.27 | 0.963          |
| Stage                      | III/IV vs. I/II                            | 1.41                | 1.02-1.96 | 0.04           |
|                            | Unknown vs. I/II                           | 0.95                | 0.3-3.03  | 0.935          |

\*CI: 95% confidence interval.
